# Supplementary material for: Two-dimensional porous γ-AlOOH and γ-Al2O3 nanosheets: hydrothermal synthesis, formation mechanism and catalytic performance
Source: Royal Society of Chemistry journal article supplement (doi:10.1039/c5ra09772j), 2015-01-01
Supplement: c5ra09772j1.pdf [file c5ra09772j1.pdf]

## Electronic Supplementary Information (ESI) for Two-Dimensional Porous $\gamma$ -AlOOH and $\gamma$ -Al<sub>2</sub>O<sub>3</sub> Nanosheets: Hydrothermal Synthesis, Formation Mechanism and Catalytic Performance

Suli Liu,<sup>\*ab</sup> Changyun Chen,<sup>a</sup> Qinpu Liu,<sup>a</sup> Yiwei Zhuo,<sup>b</sup> Dan Yuan,<sup>b</sup> Zhihui Dai<sup>b</sup> and Jianchun Bao<sup>b</sup>

<sup>a</sup>Department of Chemistry, Nanjing Xiaozhuang College, Nanjing 211171, P. R. China.

<sup>b</sup>Jiangsu Key Laboratory of Biofunctional Materials, School of Chemistry and Materials Science, Nanjing Normal University, Nanjing 210023, P. R. China.

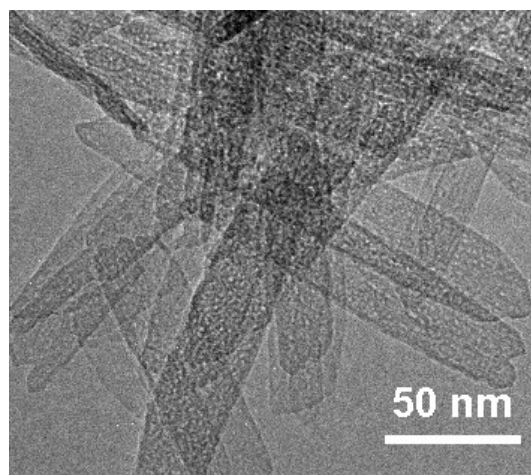

**Fig. S1** Higher resolution image of  $\gamma$ -AlOOH- $\gamma$ DPA obtained at 12 h.

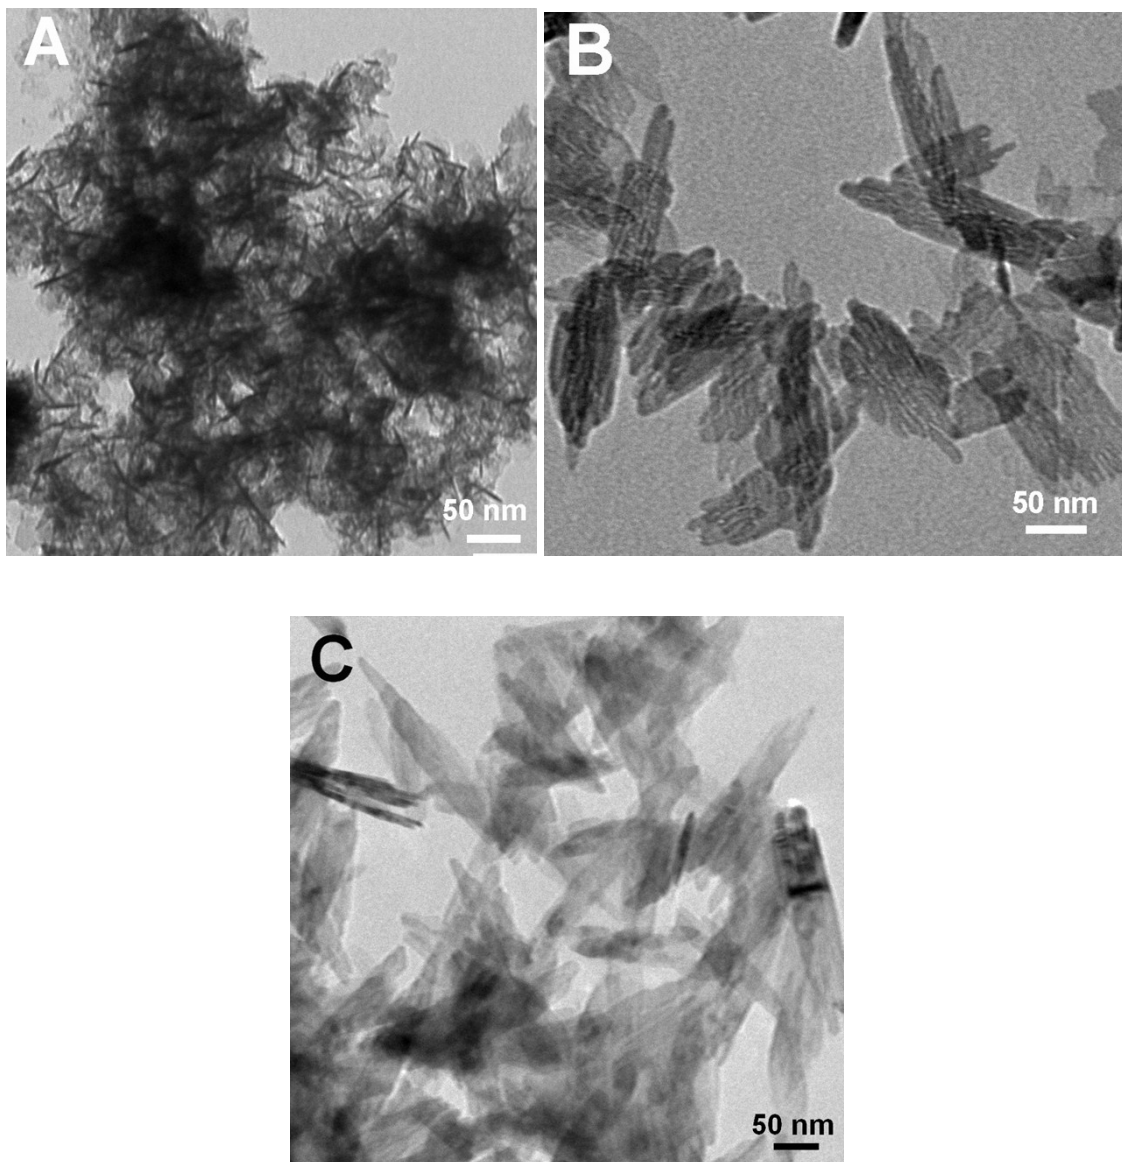

**Fig. S2** TEM images of samples obtained at 180 °C for 24 h. (A) 6-aminocaproic acid, (B) octanedioic acid and (C) undecylenic acid.

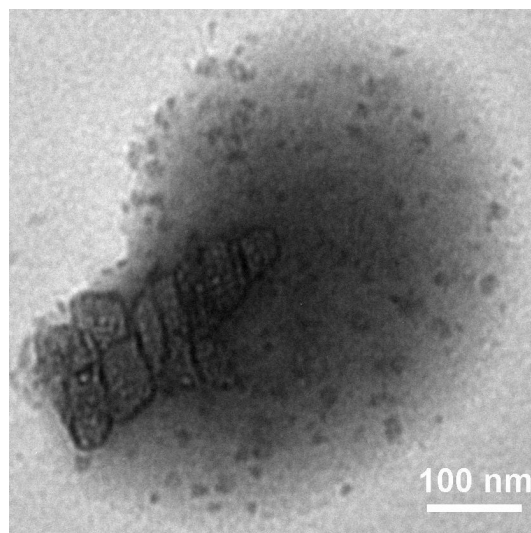

**Fig. S3** TEM image of Ag/amorphous  $\gamma$ -Al<sub>2</sub>O<sub>3</sub>.
